# Supplementary material for: Doxorubicin/Ce6-Loaded Nanoparticle Coated with Polymer via Singlet Oxygen-Sensitive Linker for Photodynamically Assisted Chemotherapy
Source: PubMed Central journal article supplement — Nanotheranostics. 2017 May 8;1(2):196–207. doi: 10.7150/ntno.18576 (PMC5646714; doi:10.7150/ntno.18576), 2017-05-08
Supplement: ntnov01p0196s1.pdf [file ntnov01p0196s1.pdf]

## Supplementary Materials

### Doxorubicin/Ce6-loaded nanoparticle coated with polymer via singlet oxygen-sensitive linker for photodynamically assisted chemotherapy

Junseok Lee, Yeong Mi Lee, Jinhwan Kim, and Won Jong Kim\*

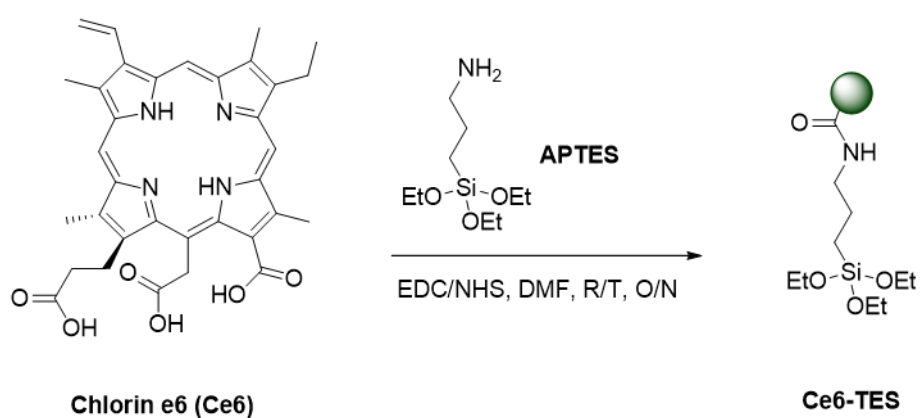

**Scheme S1.** Synthesis of Ce6-TES.

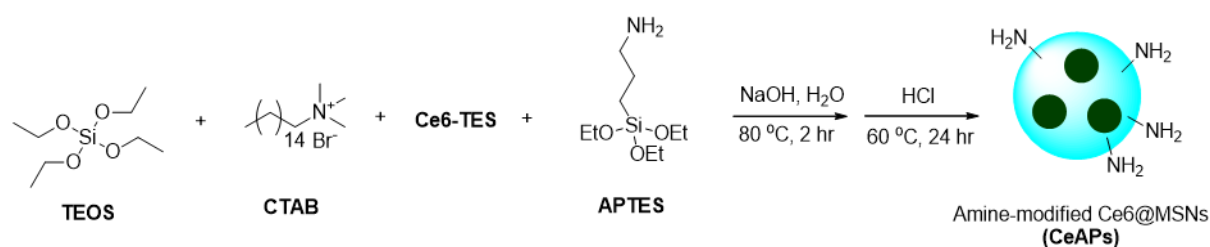

**Scheme S2.** Preparation of CeAP.

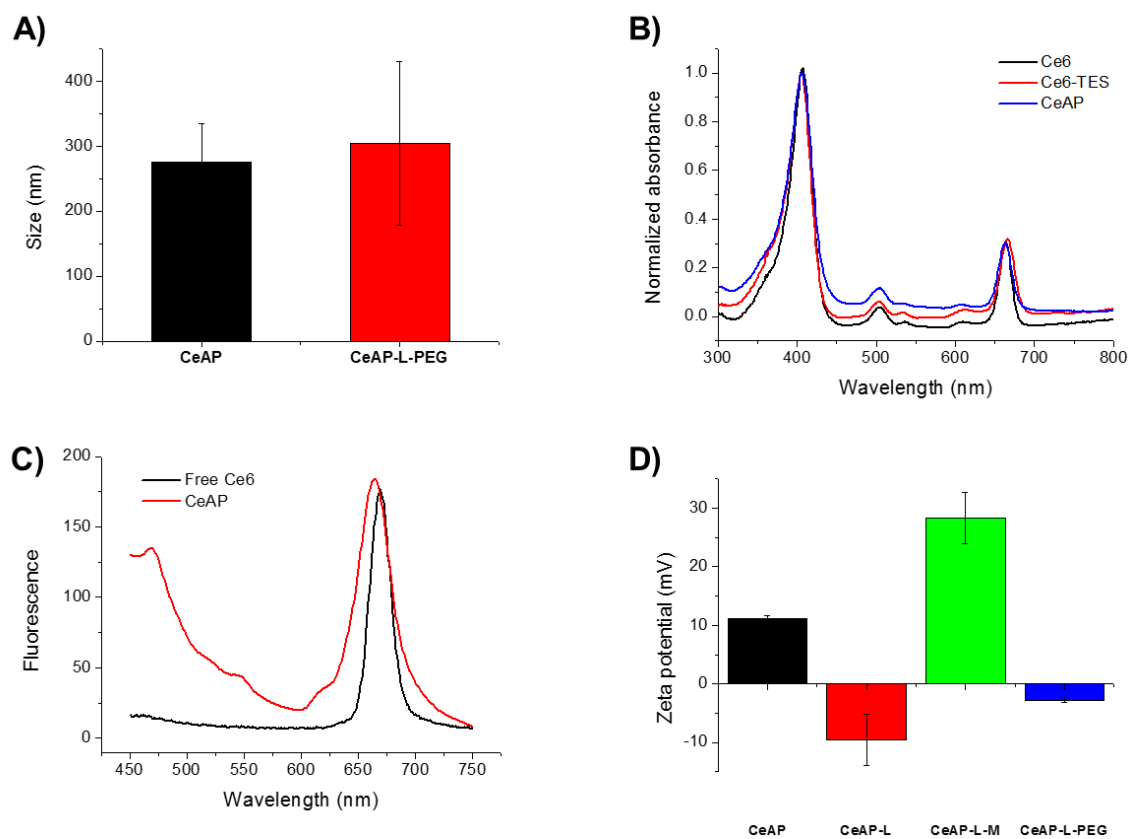

**Figure S1.** **A)** Hydrodynamic size of CeAP and CeAP-L-PEG. **B)** Normalized UV-vis spectra of Ce6, Ce6-TES and CeAP in DMSO, **C)** fluorescence spectra of Ce6 and CeAP with the same amount of Ce6, and **D)** zeta potential of nanoparticles.

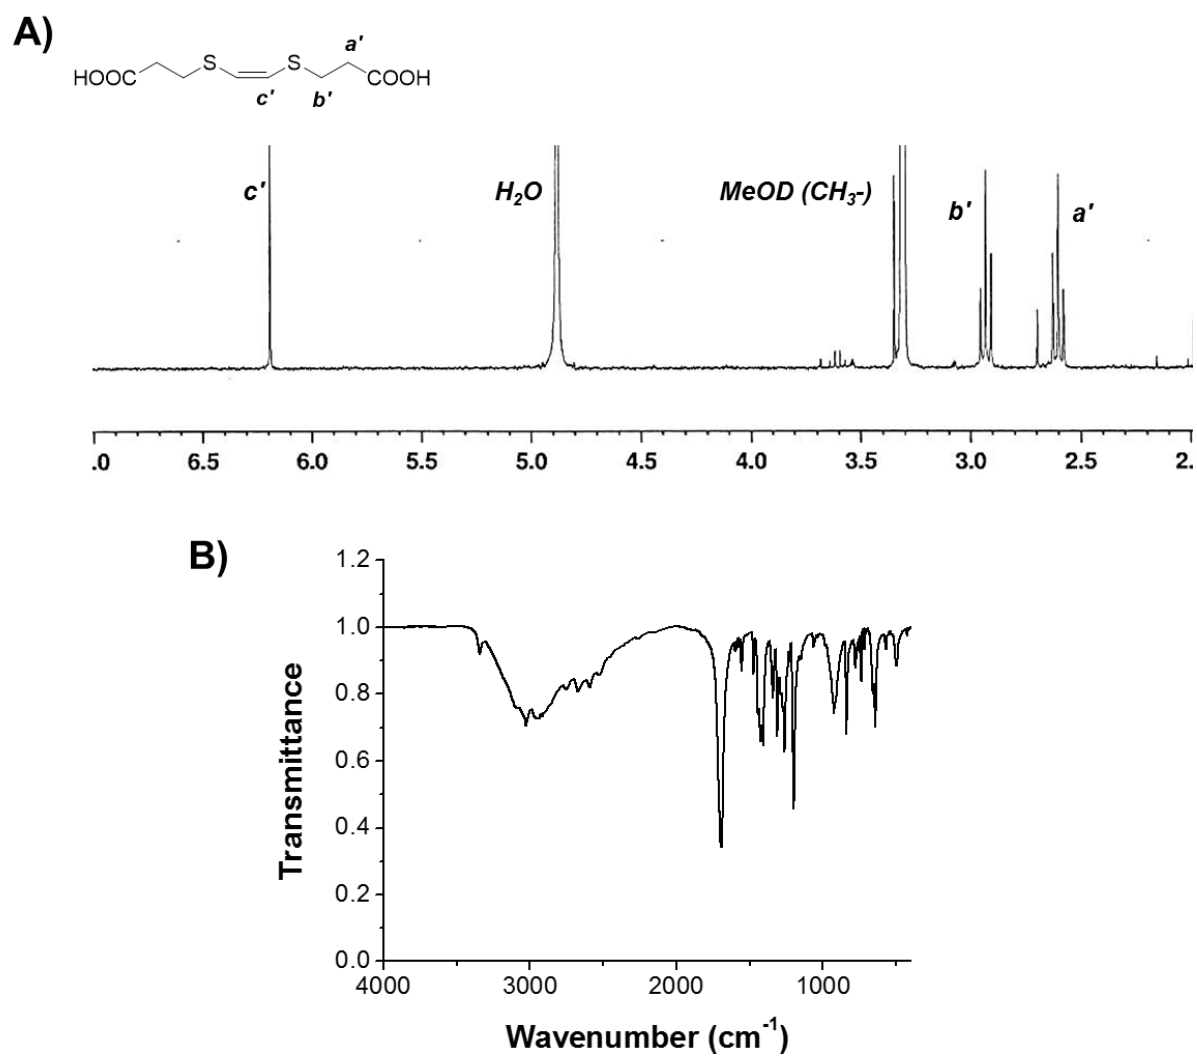

**Figure S2.** Characterization of SOSL using A)  $^1\text{H}$  NMR and B) FT-IR spectrum.

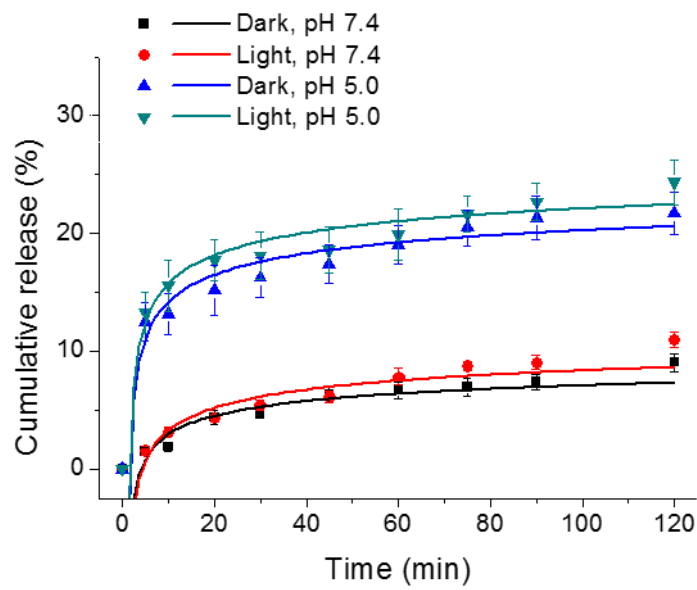

**Figure S3.** Photo-responsive drug release of DOX@CeAP-SA-PEG *in vitro*.

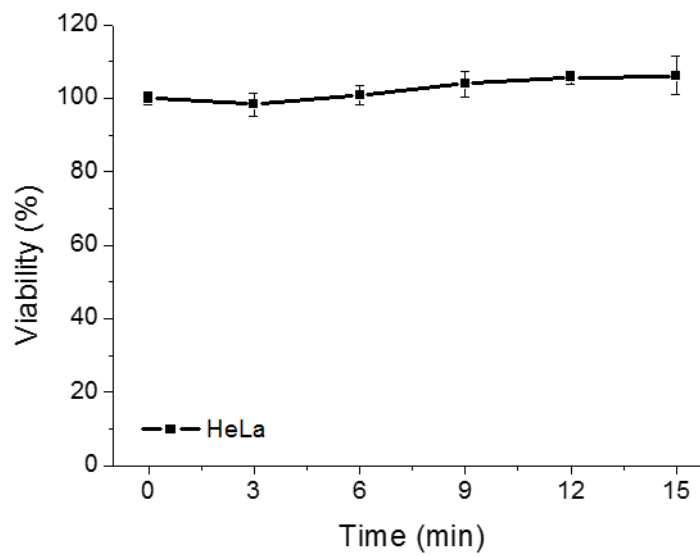

**Figure S4.** Cell viability of HeLa cell under exposure to 660 nm laser with power density of 150 mW/cm<sup>2</sup>.

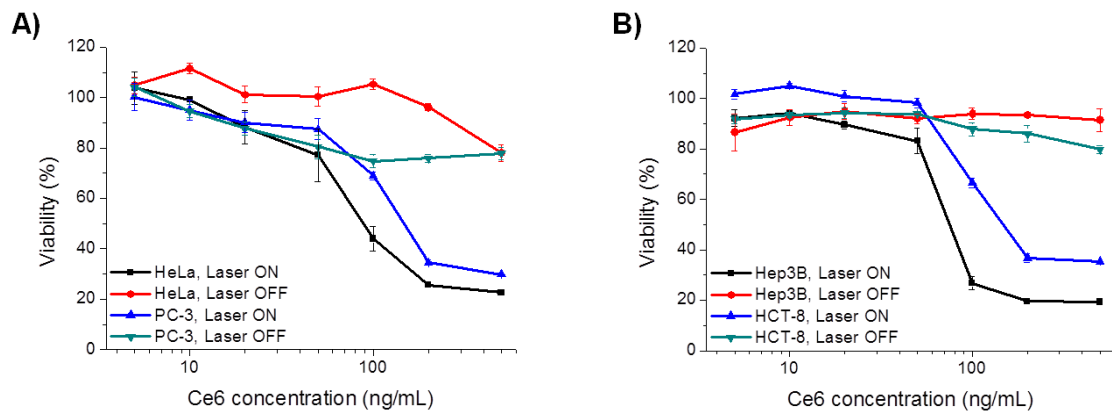

**Figure S5.** Photo-induced cytotoxicity of free Ce6 against **A)** HeLa, PC-3 and **B)** Hep3B, HCT-8 cell line.

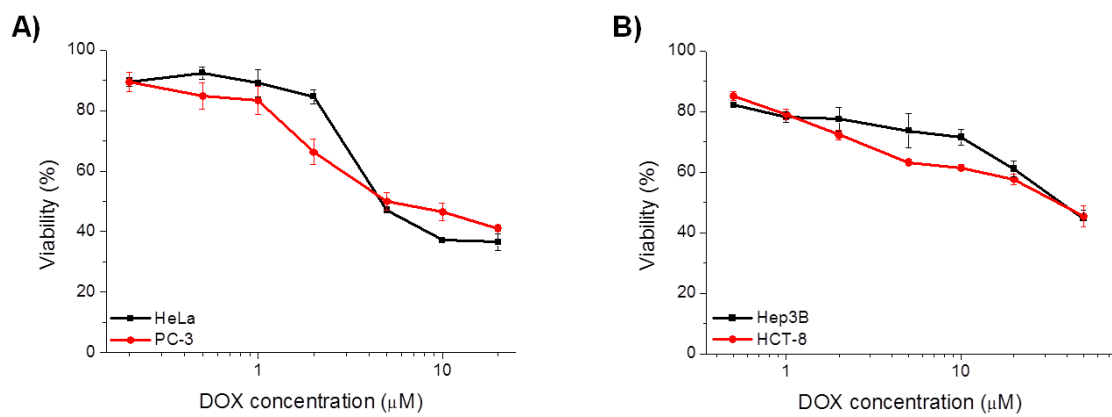

**Figure S6.** Cytotoxicity of free DOX against **A)** HeLa, PC-3 and **B)** Hep3B, HCT-8 cell line.

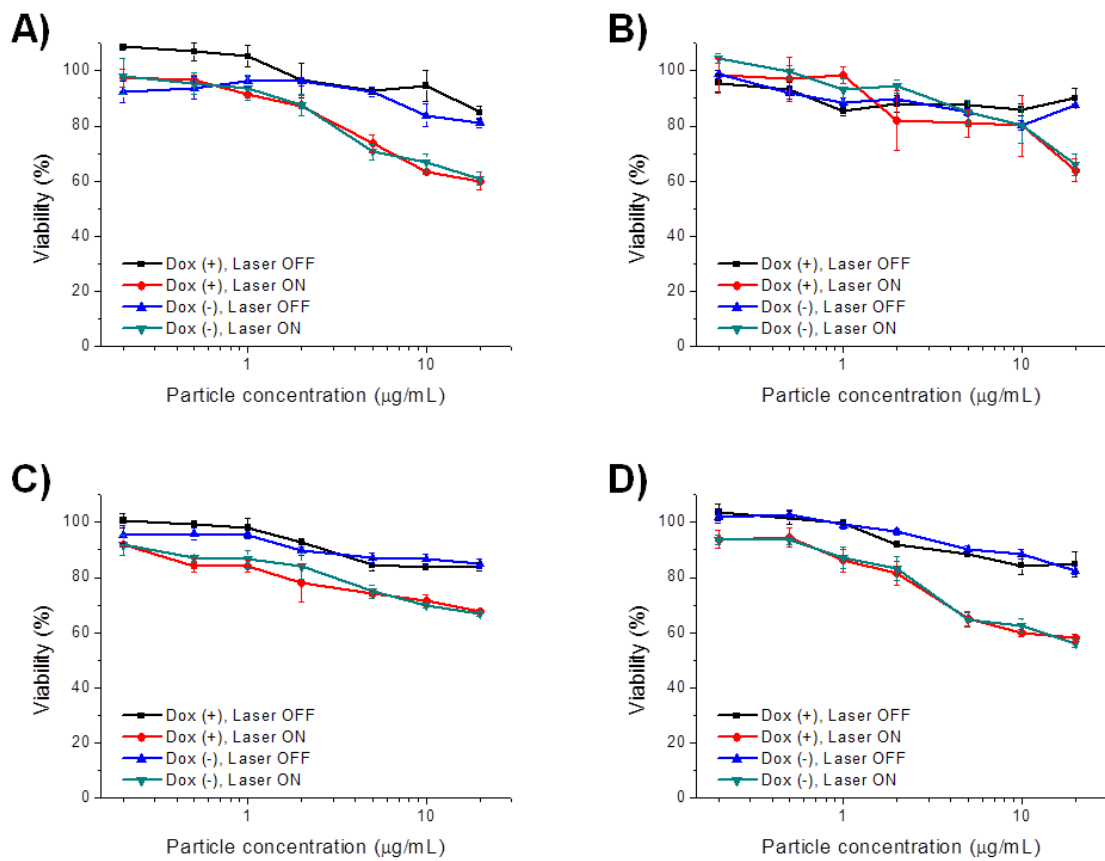

**Figure S7.** Photo-induced cytotoxicity of DOX@CeAP-SA-PEG against **A)** HeLa, **B)** PC-3, **C)** Hep3B and **D)** HCT-8 cell line.

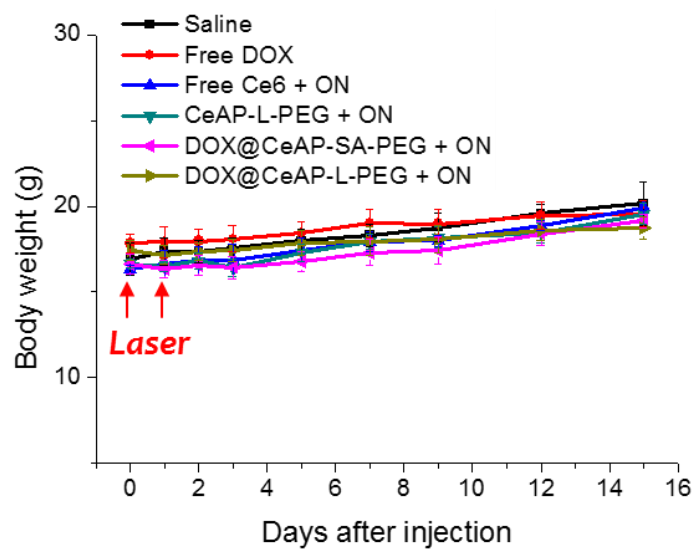

**Figure S8.** Body weight change of CT-26 bearing balb/c mice.
